# Supplementary material for: A “nano-windmill” driven by a flux of water vapour: a comparison to the rotating ATPase
Source: Royal Society of Chemistry journal article supplement (doi:10.1039/c3nr03496h), 2013-01-01
Supplement: c3nr03496h.pdf [file c3nr03496h.pdf]

## Electronic Supplementary Information

### “Nano-windmill” driven by a flux of water vapour: comparison to the rotating ATPase

*Patrycja Nitoń, Andrzej Żywociński, Marcin Fiałkowski and Robert Hołyst*

Institute of Physical Chemistry of the Polish Academy of Sciences  
44/52 Kasprzaka Street, 01-224 Warsaw, Poland

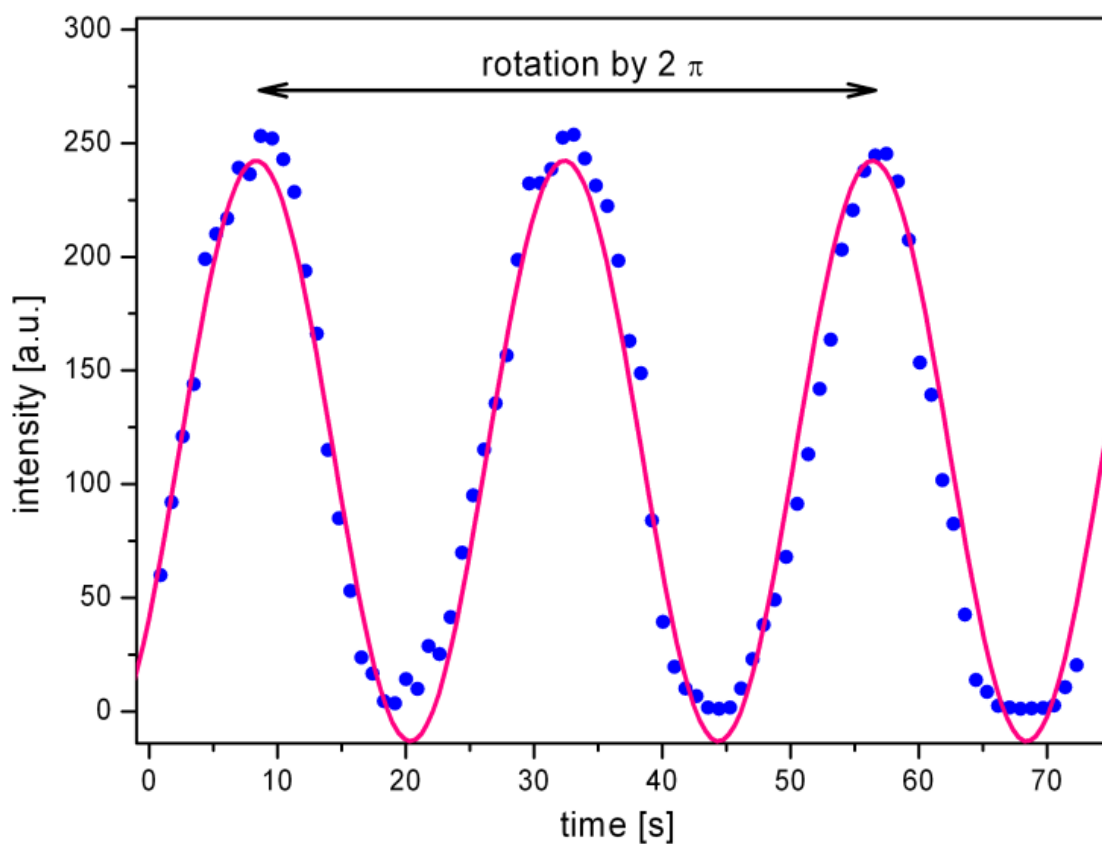

**Fig. S1** Intensity of light reflected from the central part of rotating domain in the monolayer measured as a function of time. Intensity was measured by analysis of images recorded with frequency of 1 Hz. Results were fitted to a sine function and the period of rotation was found as the fitted parameter. Plot shows the results recorded at 293.15 K (20°C) and the period 48 s was found.

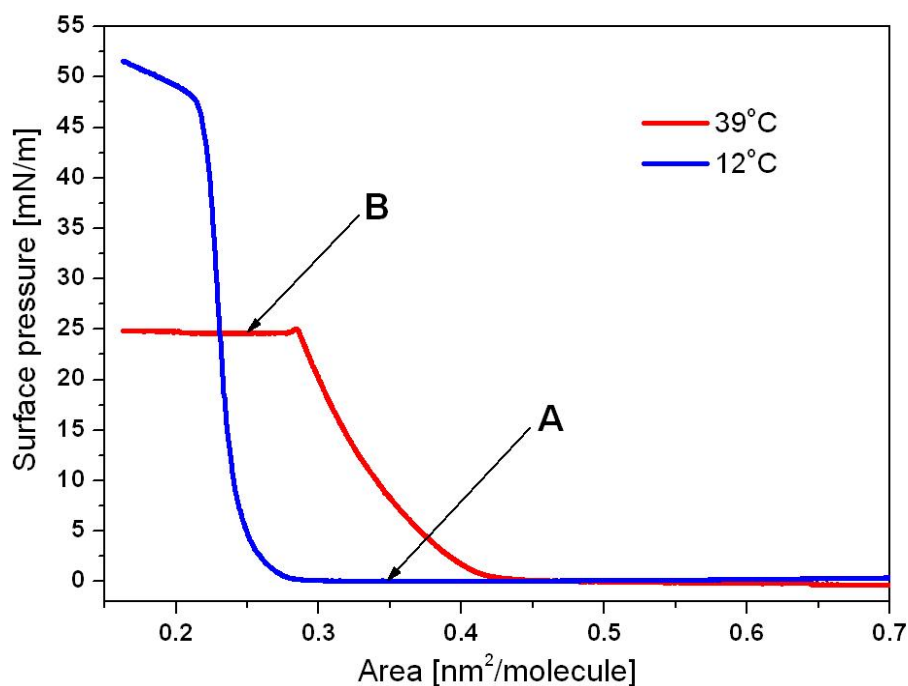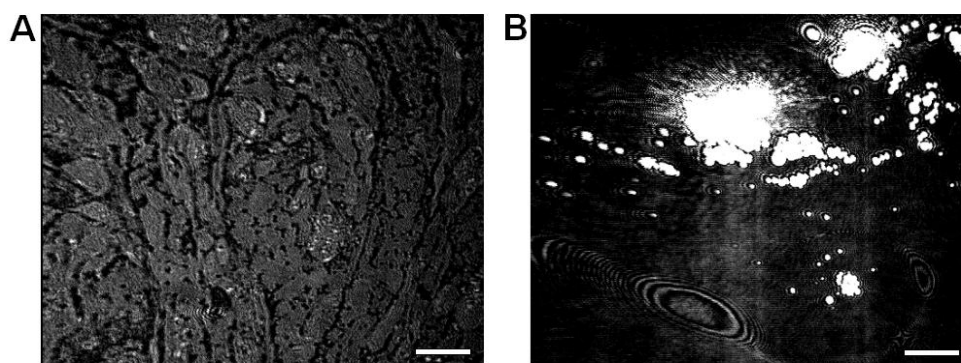

**Fig. S2** Isotherm of the ferroelectric liquid crystal (surface pressure vs. area per molecule) at the air/water interface at 285.2 K (12°C) and 312.2 K (39°C); letters A and B in the plot indicate the conditions at which the BAM images, shown below the plot, were recorded: A – rafts of solid phase in coexistence with gas phase or uncovered surface of water, B – collapse of the monolayer and crystallization of the rotating liquid phase to random aggregates of solid phase; white bars in the images show the length of 500 μm.

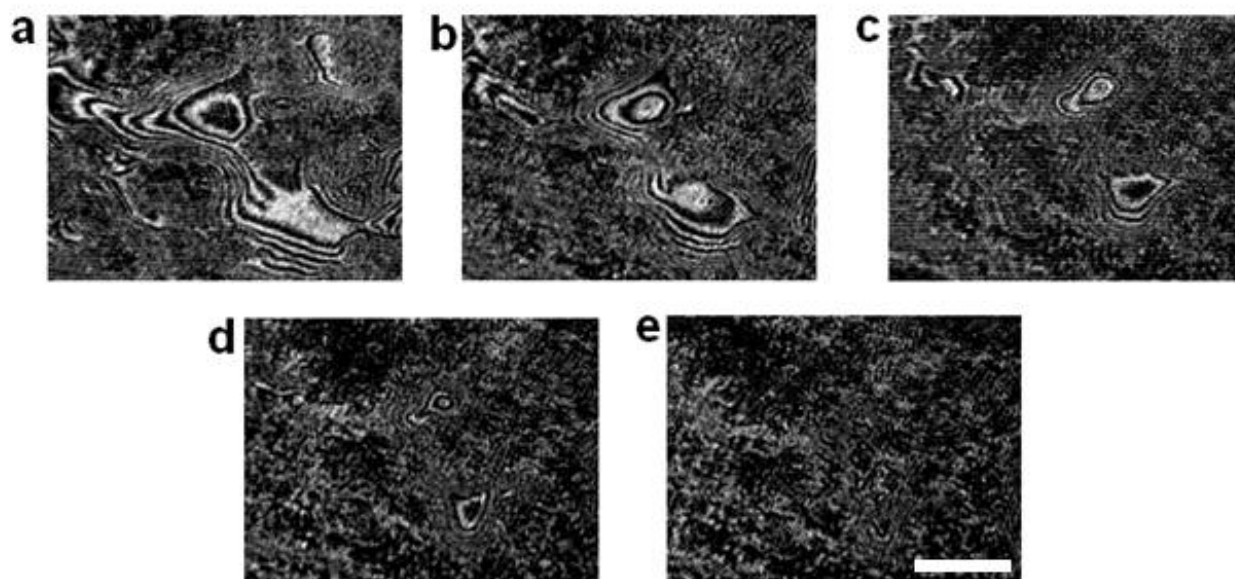

**Fig. S3** Sequence of the images recorded with 60 s time delay showing a disappearance of oscillatory pattern after decrease of temperature below 285.2 K (12°C); the rotating liquid phase vanishes leaving a texture which corresponds to coexistence of liquid phase and solid phase; white bar in the image e corresponds to length of 500  $\mu\text{m}$ .
